# Supplementary material
Source: PubMed Central journal article supplement (PMC7616964)
Supplement: EMS120539-supplement-Supplementary_Information.pdf [file EMS120539-supplement-Supplementary_Information.pdf]

**Neuron, Volume 107**

**Supplemental Information**

**Depression of Accumbal to Lateral**

**Hypothalamic Synapses Gates Overeating**

**Sarah Thoeni, Michaël Loureiro, Eoin C. O'Connor, and Christian Lüscher**

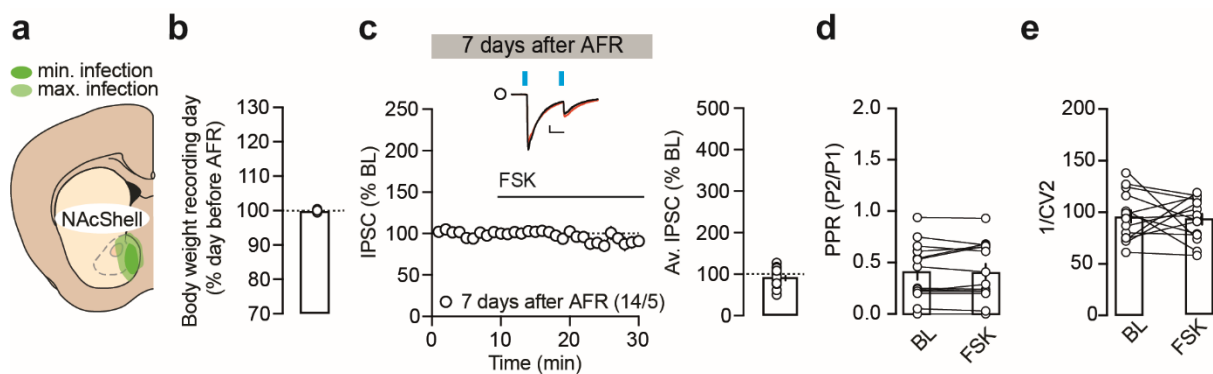

Thoeni et al.,  
Supplementary Figure 1

**Figure S1. Related to Figure 1. FSK induced i-LTP is absent 7 days after an acute food restriction episode.**

(a) Schematic representing the maximum and minimum infection with the AAV-DIO-ChR2 from animal that were kept in the study.

(b) Body weight from mice tested 7 days after a single 24h food restriction episode. Mice returned to their baseline weight.

(c) IPSC expressed as a percent of baseline (BL). Bath application of forskolin (FSK) was unable to potentiate the inhibitory transmission.

(d) PPR ratio was not changed by FSK.

(e) The coefficient of variation was not affected by FSK

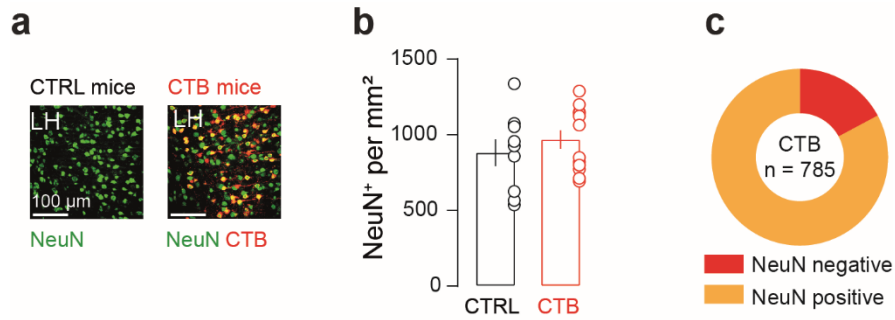

**Thoeni et al.,  
Supplementary Figure 2**

**Figure S2. Related to Figure 2. Quantification of NeuN expression in mice injected with CTB in the LH.**

(a) To control for CTB-induced lesion in the LH as a limitation of our strategy, we quantified the expression of NeuN in control or CTB-injected mice.

(b) NeuN expression density was similar in the LH of control and CTB-injected mice:  $t(19) = 0.8260$ ,  $p=0.4190$ .

(c) 82.8% of CTB positive colocalized with NeuN, further demonstrating that CTB did induce a lesion in 10 days after the injection.

Plots show mean  $\pm$  SEM.

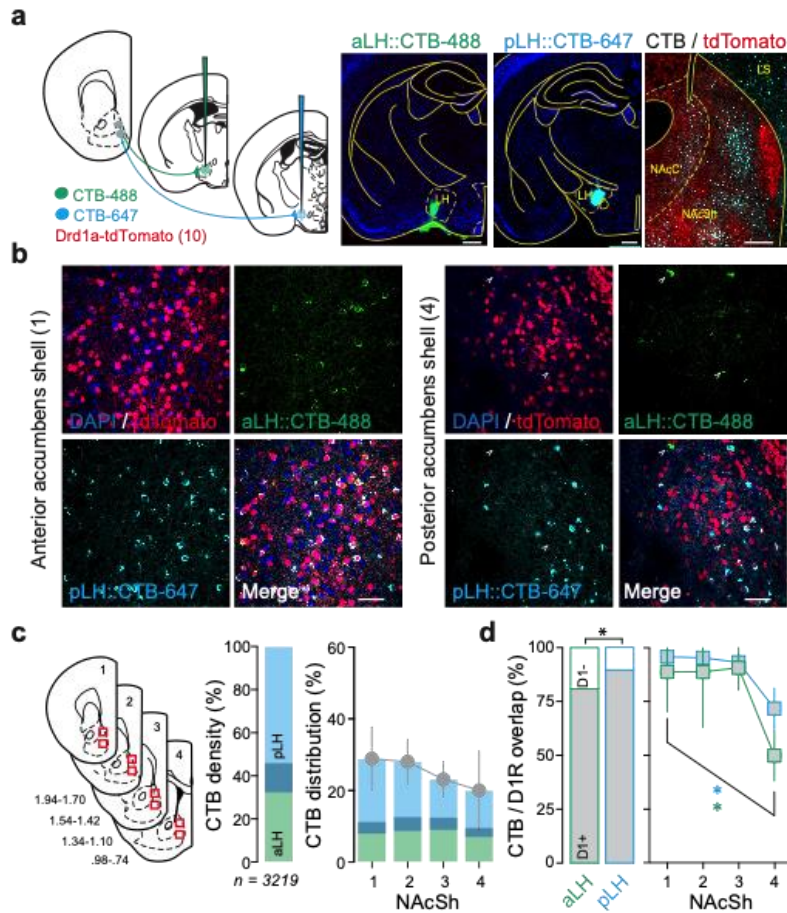

**Figure S3. Related to Figure 2. Dual retrograde tracing from anterior and posterior lateral hypothalamus in Drd1a-tdTomato mice**

(a) Schematic of experiment (left), with example images of Cholera toxin subunit-B (CTB) injection sites in anterior and posterior lateral hypothalamus (aLH/pLH) and CTB-labeled cell bodies visible in the nucleus accumbens. NAcC: accumbens core, NAcSh: accumbens shell, LS: lateral septum. All images are from the same animal. Scale bars: left & center: 500 $\mu$ m; Right, 200 $\mu$ m.

(b) From the animal in (A), confocal images from anterior (left) and posterior (right) NAcSh showing colocalization of CTB with tdTomato (i.e. D1R-MSNs). Arrowheads indicate non-colocalizing neurons located in posterior NAcSh. Scale bars: 50 $\mu$ m.

(c) Schematic indicating imaging sites across anterior/posterior NAcSh (left), with proportion of all CTB cells identified in NAcSh (n=3219) as aLH (green), pLH (light blue) or dual projecting (dark blue; center) and density distribution of each CTB type across NAcSh (right; grey points show group mean total CTB densities  $\pm$  SEM).

(d) Proportion of all aLH or pLH projecting MSNs that colocalize with tdTomato (i.e. D1R-MSNs; left). Significantly fewer MSNs projecting to aLH vs. pLH were D1R+ (80.9  $\pm$  3.51% vs. 89.5  $\pm$  0.7%; paired t-test, \*p < 0.05). Distribution of CTB/tdTomato overlap across anterior/posterior NAcSh (right). Significantly fewer MSNs located in the most posterior quarter of NAcSh and projecting to either aLH or pLH were D1R+ (area 1 vs. 4, Bonferroni corrected t-test, \*p < 0.016).

Plots shows means  $\pm$  SEM.

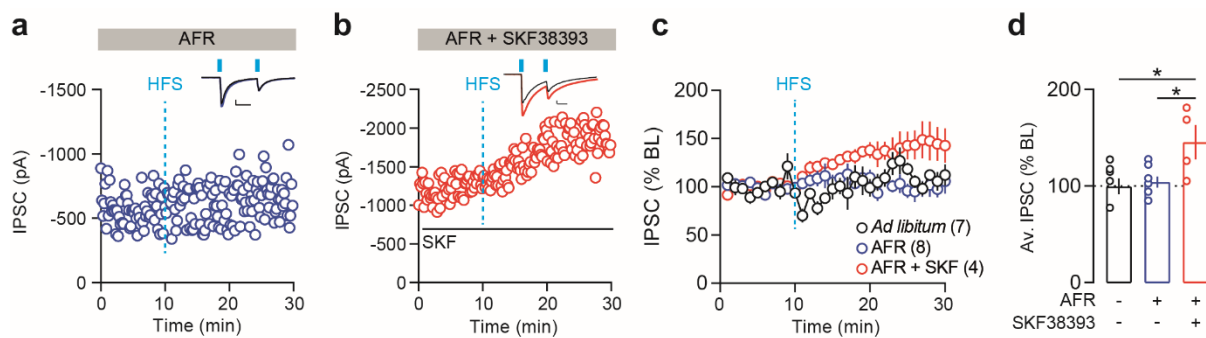

Thoeni et al.,  
Supplementary Figure S4

**Figure S4. Related to Figure 6. Ex vivo 100Hz high frequency optogenetic stimulation at D1-MSN to LH synapse.**

- (a) IPSC example recorded from a cell in the LH in food restricted mice. Stimulation occurred at 10 min.
- (b) IPSC example recorded from a cell in the LH in food restricted mice. In this preparation, the D1 agonist SKF38393 was present in the bath during the entire recording.
- (c) IPSC expressed as a percentage of baseline for all recorded cell from control, AFR and AFR + SKF38393 groups.
- (d) Grouped IPSC. The IPSC was significantly increased in AFR mice when SKF38393 was bath applied. ANOVA:  $F(2,16) = 4.073$ ,  $p < 0.05$ . Post-hoc Bonferonni t-test: \*  $p < 0.05$ .

## SUPPLEMENTARY TABLES

| Experiment & Figure         | Mouse line                    | Virus / Tracer                                           | Injection site | n  |
|-----------------------------|-------------------------------|----------------------------------------------------------|----------------|----|
| CTB in LH and VP<br>Fig. 2  | Drd1a-tdTomato                | CTB-Alexa488, CTB-Alexa567                               | LH, VP         | 5  |
| CTB in LH and VTA<br>Fig. 2 | Drd1a-tdTomato                | CTB-Alexa488, CTB-Alexa567                               | LH, VTA        | 6  |
| Rabies tracing<br>Fig.3     | Drd1a-tdTomato<br>X VGluT2Cre | AAV5-Flex-TVA-mCherry<br>AAV8-Flex-RG<br>SADΔG-EFG(EnvA) | LH             | 2  |
| aLH and pLH<br>Fig. S3      | Drd1a-tdTomato                | CTB-Alexa488, CTB-Alexa567                               | aLH, pLH       | 10 |

**Table S1. Related to Figure 2 and Figure 3. Details of mice used in tracing experiments.**

| Experiment & Figure                                               | Mouse line | Virus / Tracer                                       | Injection site                      | n  |
|-------------------------------------------------------------------|------------|------------------------------------------------------|-------------------------------------|----|
| HFS, FSK and Control cells<br>Fig. 1                              | D1Cre      | AAV5-EF1A-DIO-ChR2(H134R)-<br>eYFP                   | NAcSh                               | 22 |
| FSK in the VP and Control<br>cells<br>Fig. 1                      | D1Cre      | AAV5-EF1A-DIO-ChR2(H134R)-<br>eYFP                   | NAcSh                               | 5  |
| FSK and Control cells<br>Fig. 3                                   | VGATCre    | AAV5-hsyn-ChR2(H134R)-eYFP<br>AAV5-DIO-EF1A-mCherry  | NAc (Chr2)<br>LH<br>(mCherry)       | 6  |
| LH VGluT2 connectivity<br>Fig. 3                                  | VGluT2Cre  | AAV5-hsyn-ChR2(H134R)-eYFP<br>AAV5-DIO-EF1A-tdTomato | NAcSh<br>(ChR2)<br>LH<br>(TdTomato) | 5  |
| FSK and Control cells<br>Fig. 3                                   | VGluT2Cre  | AAV5-hsyn-ChR2(H134R)-eYFP<br>AAV5-DIO-EF1A-mCherry  | NAc (Chr2)<br>LH<br>(mCherry)       | 6  |
| Acute food restriction and<br>FSK<br>Fig. 1                       | D1Cre      | AAV5-EF1A-DIO-ChR2(H134R)-<br>eYFP                   | NAcSh                               | 12 |
| 7 days after acute food<br>restriction<br>Fig. S1                 | D1Cre      | AAV5-EF1A-DIO-ChR2(H134R)-<br>eYFP                   | NAcSh                               | 14 |
| Acute food restriction and<br>FSK in LH GABA cells<br>Fig. 3      | VGATCre    | AAV5-hsyn-ChR2(H134R)-eYFP<br>AAV5-DIO-EF1A-mCherry  | NAc (Chr2)<br>LH<br>(mCherry)       | 12 |
| Acute food restriction and<br>FSK in LH glutamate cells<br>Fig. 3 | VGluT2Cre  | AAV5-hsyn-ChR2(H134R)-eYFP<br>AAV5-DIO-EF1A-tdTomato | NAcSh<br>(ChR2)<br>LH<br>(TdTomato) | 10 |
| WIN55212-2 and Control<br>cells in ad libitum fed mice<br>Fig. 4  | D1Cre      | AAV5-EF1A-DIO-ChR2(H134R)-<br>eYFP                   | NAcSh                               | 16 |
| Acute food restriction and<br>CB1R antagonist on slice<br>Fig. 4  | D1cre      | AAV5-EF1A-DIO-ChR2(H134R)-<br>eYFP                   | NAcSh                               | 15 |

|                                                      |       |                                |       |    |
|------------------------------------------------------|-------|--------------------------------|-------|----|
| Acute food restriction and CB1R antagonist<br>Fig. 5 | D1Cre | AAV5-EF1A-DIO-ChR2(H134R)-eYFP | NAcSh | 32 |
| High fat exposure<br>Fig. 1 and 5                    | D1Cre | AAV5-EF1A-DIO-ChR2(H134R)-eYFP | NAcSh | 16 |

**Table S2. Related to Figure 1, Figure 3, Figure 4 and Figure S1. Details of mice used for whole-cell patch clamp recordings.**

| <b>Experiment &amp; Figure</b>                                | <b>Mouse line</b> | <b>n</b> |
|---------------------------------------------------------------|-------------------|----------|
| Acute food restriction and systemic CB1R antagonist<br>Fig. 5 | C57BL/6J          | 14       |
| High fat exposure and CB1R antagonist<br>Fig. 5               | C57BL/6J          | 15       |
| Acute food restriction and HFS in vivo<br>Fig. 6              | D1cre             | 7        |
| Local infusion of CB1R agonists and antagonist<br>Fig. 5      | C57BL/6J          | 12       |

**Table S3. Related to Figure 5 and Figure 6. Details for the mice used for behavioural experiments.**
